# Supplementary material for: Proteomic Dissection of Endosperm Starch Granule Associated Proteins Reveals a Network Coordinating Starch Biosynthesis and Amino Acid Metabolism and Glycolysis in Rice Endosperms
Source: Front Plant Sci. 2016 May 25;7:707. doi: 10.3389/fpls.2016.00707 (PMC4879773; doi:10.3389/fpls.2016.00707)
Supplement: Supplementary file 4 [file Table4.XLSX]

## Sheet: Table S4
Table S4. Isoforms of identified proteins. UPN: unique protein number. Spot No. with separator (.) represent spots having 2 or more proteins. Number before the separator represent spot no., and those after the separator represent the number of identified proteins in the spot.
Function category	UPN	Spot No.	Protein name	Accession No.	Chromosome locus	Theoretical		Experiment		Score	Sequence coverage (%)	Peptides(95%)
						MW	pI	MW	pI
01 Starch biosynthesis
	1	195	alpha 1,4-glucan phosphorylase L isozyme (Pho1)	gi|13195430	LOC_Os03g55090	105091	5.38	87015	5.3697	162	5	2
		196	alpha 1,4-glucan phosphorylase L isozyme (Pho1)	gi|13195430	LOC_Os03g55090	105091	5.38	86902	5.4454	173	4	2
		197	alpha 1,4-glucan phosphorylase L isozyme (Pho1)	gi|13195430	LOC_Os03g55090	105091	5.38	86790	5.521	703	14	9
		198	alpha 1,4-glucan phosphorylase L isozyme (Pho1)	gi|13195430	LOC_Os03g55090	105091	5.38	86677	5.6005	475	8	7
		199	alpha 1,4-glucan phosphorylase L isozyme (Pho1)	gi|13195430	LOC_Os03g55090	105091	5.38	86790	5.6914	869	19	13
	2	248.1	Pullulanase (PUL)	gi|222628355	LOC_Os08g40930	100410	5.58	85782	5.347	136	5	1
		254	Pullulanase (PUL)	gi|222628355	LOC_Os08g40930	100410	5.58	85560	6.4899	1079	19	13
		260	Pullulanase (PUL)	gi|222628355	LOC_Os08g40930	100410	5.58	85560	6.0585	931	20	9
		261	Pullulanase (PUL)	gi|222628355	LOC_Os08g40930	100410	5.58	85560	6.1985	948	19	13
		262	Pullulanase (PUL)	gi|222628355	LOC_Os08g40930	100410	5.58	85560	6.3423	1134	20	12
		266	Pullulanase (PUL)	gi|222628355	LOC_Os08g40930	100410	5.58	85449	5.7973	345	13	4
		267	Pullulanase (PUL)	gi|222628355	LOC_Os08g40930	100410	5.58	85449	5.926	610	16	7
	3	525	Starch synthase I (SSI)	gi|5734103	LOC_Os06g06560	69125	6.09	74469	5.4113	606	20	8
		526	Starch synthase I (SSI)	gi|5734103	LOC_Os06g06560	69125	6.09	74373	5.5513	770	20	8
		527	Starch synthase I (SSI)	gi|5734103	LOC_Os06g06560	69125	6.09	74276	5.7141	79	7	1
		543	Starch synthase I (SSI)	gi|5734103	LOC_Os06g06560	69125	6.09	74469	5.2599	534	19	7
	4	758.1	ADP-glucose pyrophosphorylase large subunit isoform (AGPase L2)	gi|13540812	LOC_Os01g44220	58312	5.54	64481	5.3091	243	12	2
		780.1	ADP-glucose pyrophosphorylase large subunit (AGPase L)	gi|215981483	LOC_Os01g44220	58230	5.55	63981	6.1644	720	24	9
		840.2	ADP-glucose pyrophosphorylase large subunit isoform (AGPase L2)	gi|13540812	LOC_Os01g44220	58312	5.54	62019	5.7027	63	5	1
	5	751	granule-bound starch synthase (GBSSI)	gi|7798551	LOC_Os06g04200	66928	8.34	65069	7.8107	812	24	10
		758.2	granule-bound starch synthase (GBSSI)	gi|7798551	LOC_Os06g04200	66928	8.34	64481	5.3091	40	5	1
		771	granule-bound starch synthase (GBSSI)	gi|7798551	LOC_Os06g04200	66928	8.34	64314	7.5723	1069	26	13
		781	granule-bound starch synthase (GBSSI)	gi|7798551	LOC_Os06g04200	66928	8.34	64314	8.4049	379	18	4
		786	granule-bound starch synthase (GBSSI)	gi|7798551	LOC_Os06g04200	66928	8.34	64230	8.492	429	21	6
		794	granule-bound starch synthase (GBSSI)	gi|7798551	LOC_Os06g04200	66928	8.34	63981	7.8599	852	28	10
		795	granule-bound starch synthase (GBSSI)	gi|7798551	LOC_Os06g04200	66928	8.34	64064	8.0151	663	24	9
		801	granule-bound starch synthase (GBSSI)	gi|7798551	LOC_Os06g04200	66928	8.34	63981	6.3385	778	22	11
		802	granule-bound starch synthase (GBSSI)	gi|7798551	LOC_Os06g04200	66928	8.34	63815	6.5	939	27	11
		803	granule-bound starch synthase (GBSSI)	gi|7798551	LOC_Os06g04200	66928	8.34	63815	6.7435	922	25	11
		810	granule-bound starch synthase (GBSSI)	gi|7798551	LOC_Os06g04200	66928	8.34	63649	7.2922	989	24	12
		812	granule-bound starch synthase (GBSSI)	gi|7798551	LOC_Os06g04200	66928	8.34	63649	7.0576	880	25	9
		813	granule-bound starch synthase (GBSSI)	gi|7798551	LOC_Os06g04200	66928	8.34	63649	7.3944	1056	31	10
		814	granule-bound starch synthase (GBSSI)	gi|7798551	LOC_Os06g04200	66928	8.34	63649	7.7237	784	22	8
		819	granule-bound starch synthase (GBSSI)	gi|7798551	LOC_Os06g04200	66928	8.34	63156	7.2128	925	26	11
		824	granule-bound starch synthase (GBSSI)	gi|7798551	LOC_Os06g04200	66928	8.34	62342	7.5837	1090	28	12
		1009	granule-bound starch synthase (GBSSI)	gi|7798551	LOC_Os06g04200	66928	8.34	55977	7.561	310	11	5
		506.2	UDP-glucose starch glycosyl transferase, partial (GBSSI)	gi|553108	LOC_Os06g04200	22274	5.59	74760	8.1059	70	14	1
		772	UDP-glucose starch glycosyl transferase, partial (GBSSI)	gi|553108	LOC_Os06g04200	22274	5.59	64397	8.1665	181	38	3
		780.2	UDP-glucose starch glycosyl transferase, partial (GBSSI)	gi|553108	LOC_Os06g04200	22274	5.59	63981	6.1644	244	38	4
		869.2	UDP-glucose starch glycosyl transferase, partial (GBSSI)	gi|553108	LOC_Os06g04200	22274	5.59	60274	7.6594	254	29	4
		934	UDP-glucose starch glycosyl transferase, partial (GBSSI)	gi|553108	LOC_Os06g04200	22274	5.59	58274	7.5685	98	22	1
	6	892	UDP-glucose pyrophosphorylase (UGPase)	gi|88866516	LOC_Os09g38030	51791	5.43	59420	5.4416	222	11	2
		895	UDP-glucose pyrophosphorylase (UGPase)	gi|88866516	LOC_Os09g38030	51791	5.43	59420	5.6611	123	8	1
	7	910	ADP-glucose pyrophosphorylase 51kD subunit (AGPase S2a)	gi|169759	LOC_Os08g25734	53747	5.65	58730	6.3499	433	16	5
		911	ADPglucose pyrophosphorylase (AGPase S2a)	gi|169761	LOC_Os08g25734	53764	5.65	53764	6.5845	866	33	12
02 Amino acid biosynthesis
	8	869.1	Alanine aminotransferase (ALAAT-2)	gi|115481822	LOC_Os10g25130	53130	6.23	60274	7.6594	485	21	5
		871	alanine aminotransferase (ALAAT-2)	gi|14018051	LOC_Os10g25130	53229	6.23	60352	7.2809	195	10	2
03 Nucleotide metabolism
	9	776.2	nucleotide pyrophosphatase/phosphodiesterase	gi|115480025	LOC_Os09g32840	69958	6.12	64397	8.2952	39	1	1
		1583.2	Diphosphonucleotide phosphatase 1 precursor	gi|115480025	LOC_Os09g32840	69958	6.12	40053	6.3839	39	1	1
04 Storage protein
	10	110.1	glutelin	gi|115440097	LOC_Os01g55690	56782	9.09	108466	8.1059	377	19	5
		1554.2	glutelin	gi|20215	LOC_Os01g55690	56752	9.09	40523	7.0992	140	4	3
		1793.1	Glutelin	gi|115440097	LOC_Os01g55690	56782	9.09	34233	8.9461	121	13	1
		1644.2	glutelin	gi|20215	LOC_Os01g55690	56752	9.09	37830	6.3877	144	4	2
	11	776.1	prepro-glutelin	gi|218165	LOC_Os10g26060	56855	8.93	64397	8.2952	279	13	4
		1543.1	prepro-glutelin	gi|218165	LOC_Os10g26060	56855	8.93	40681	6.7132	269	8	4
		1583.1	prepro-glutelin	gi|218165	LOC_Os10g26060	56855	8.93	40053	6.3839	262	8	4
	12	1427.1	glutelin	gi|31455453	LOC_Os02g16820	36038	6.6	44146	8.6471	268	24	4
		2287	glutelin	gi|31455453	LOC_Os02g16820	36038	6.6	20746	8.4693	208	18	4
		2419	glutelin	gi|31455453	LOC_Os02g16820	36038	6.6	17413	8.4352	260	13	4
		1543.3	glutelin	gi|31455453	LOC_Os02g16820	36038	6.6	40681	6.7132	62	6	1
	14	1543.2	glutelin	gi|20208	LOC_Os03g31360	56610	8.81	40681	6.7132	201	8	2
		1554.1	glutelin	gi|20208	LOC_Os03g31360	56610	8.81	40523	7.0992	409	10	4
		1644.1	glutelin	gi|20208	LOC_Os03g31360	56610	8.81	37830	6.3877	167	6	2
05 Protein folding
	18	468	Heat shock 70 protein (HSP70)	gi|115487998	LOC_Os12g14070	74269	5.11	77828	4.3138	584	16	6
		510	Heat shock 70 protein (HSP70)	gi|115487998	LOC_Os12g14070	74269	5.11	74469	4.4462	443	12	6
		548	Heat shock 70 protein (HSP70)	gi|115487998	LOC_Os12g14070	74269	5.11	74276	4.1586	850	17	8
		549	Heat shock 70 protein (HSP70)	gi|115487998	LOC_Os12g14070	74269	5.11	74276	4.3213	649	16	8
		625.1	Heat shock 70 protein (HSP70)	gi|115487998	LOC_Os12g14070	74269	5.11	71071	4.151	131	3	2
	21	754	Protein disulfide isomerase-like 1-1 (PDIL1-1)	gi|125533732	LOC_Os11g09280	57033	4.97	64648	4.4954	379	15	4
		755.1	Protein disulfide isomerase-like 1-1 (PDIL1-1)	gi|125533732	LOC_Os11g09280	57033	4.97	64648	4.5787	130	9	1
06 PPDK
	22	316	orthophosphate dikinase (PPDKB)	gi|2443402	LOC_Os05g33570	103592	5.98	83476	5.2902	514	12	6
		317	orthophosphate dikinase (PPDKB)	gi|2443402	LOC_Os05g33570	103592	5.98	83476	5.3772	717	11	4
		320	Orthophosphate dikinase precursor (PPDKB)	gi|115463815	LOC_Os05g33570	103578	5.98	83476	5.4681	593	11	9
		322	Orthophosphate dikinase precursor (PPDKB)	gi|115463815	LOC_Os05g33570	103578	5.98	83368	5.5665	1091	18	14
		325	orthophosphate dikinase (PPDKB)	gi|2443402	LOC_Os05g33570	103592	5.98	83152	4.9685	107	4	2
		327	orthophosphate dikinase (PPDKB)	gi|2443402	LOC_Os05g33570	103592	5.98	83260	5.1047	176	8	1
		330	Orthophosphate dikinase precursor (PPDKB)	gi|115463815	LOC_Os05g33570	103578	5.98	83260	5.6724	920	14	13
		331	Orthophosphate dikinase precursor (PPDKB)	gi|115463815	LOC_Os05g33570	103578	5.98	83260	5.9109	356	12	4
		336	orthophosphate dikinase (PPDKB)	gi|2443402	LOC_Os05g33570	103592	5.98	83044	5.786	717	12	8
07 Glycolysis
	25	966	Phosphoglycerate kinase, cytosolic (PGK)	gi|115444481	LOC_Os02g07260	42196	5.64	57374	6.1455	698	36	7
		1077	phosphoglycerate kinase (PGK)	gi|114386664	LOC_Os02g07260	42224	5.64	53701	5.82	428	23	5
		1080	Phosphoglycerate kinase, cytosolic (PGK)	gi|115444481	LOC_Os02g07260	42196	5.64	53631	6.1228	1193	39	11
		1164	phosphoglycerate kinase (PGK)	gi|114386664	LOC_Os02g07260	42224	5.64	51517	6.1266	321	15	4
	26	1281	Glyceraldehyde-3-phosphate dehydrogenase, cytosolic 3 (GAPDH)	gi|115447137	LOC_Os02g38920	36716	7.68	47968	9.23	253	17	3
		1405	Glyceraldehyde-3-phosphate dehydrogenase, cytosolic 3 (GAPDH)	gi|115447137	LOC_Os02g38920	36716	7.68	36716	9.2186	261	18	3
		1428.1	Glyceraldehyde-3-phosphate dehydrogenase, cytosolic 3 (GAPDH)	gi|115447137	LOC_Os02g38920	36716	7.68	44376	8.9386	402	25	6
08 Stress response
	29	1696	desiccation-related protein PCC13-62 precursor	gi|38346151	LOC_Os04g33150	33953	4.91	35963	4.257	479	22	4
		1705	desiccation-related protein PCC13-62 precursor	gi|38346151	LOC_Os04g33150	33953	4.91	35963	4.4122	358	27	5
		1712	desiccation-related protein PCC13-62 precursor	gi|38346151	LOC_Os04g33150	33953	4.91	35963	4.1094	728	35	7
	30	2014	germin-like protein 3	gi|2655289	LOC_Os08g08960	19629	8.89	28069	8.227	172	30	2
		2045	germin-like protein 3	gi|2655289	LOC_Os08g08960	19629	8.89	27816	7.3869	47	8	1
		2096	germin-like protein 3	gi|2655289	LOC_Os08g08960	19629	8.89	26375	7.3944	95	8	1
09 Protein transport
	31	248.2	chloroplast inner envelope protein	gi|10140720	LOC_Os10g35010	108210	5.37	85782	5.347	79	2	1
		252	chloroplast inner envelope protein	gi|10140720	LOC_Os10g35010	108210	5.37	85671	5.2788	44	1	1
	32	506.1	Chloroplastic outer envelope membrane protein (OEP75) precursor (Outer membrane protein)	gi|115452177	LOC_Os03g16440	88145	8.5	74760	8.1059	326	13	4
		507	Chloroplastic outer envelope membrane protein (OEP75) precursor (Outer membrane protein)	gi|115452177	LOC_Os03g16440	88145	8.5	74760	8.2914	841	23	11
		524	Chloroplastic outer envelope membrane protein (OEP75) precursor (Outer membrane protein)	gi|115452177	LOC_Os03g16440	88145	8.5	74663	8.4693	1006	23	12
		546	Chloroplastic outer envelope membrane protein (OEP75) precursor (Outer membrane protein)	gi|115452177	LOC_Os03g16440	88145	8.5	74469	8.6169	447	19	4
10 other
	34	755.2	hypothetical protein OsJ_04535	gi|125573095	LOC_Os01g68720	29680	10.36	64648	4.5787	55	8	1
		1793.2	hypothetical protein OsJ_04535	gi|125573095	LOC_Os01g68720	29680	10.36	34233	8.9461	47	8	1
	35	1120	actin	gi|20329	LOC_Os10g36650	42204	5.72	52940	5.3053	158	10	2
		1123	actin	gi|20322	LOC_Os10g36650	42211	5.22	52871	5.1312	117	7	1
